# Supplementary material
Source: ML conference proceedings conference paper supplement (https://proceedings.mlr.press/v139/nabati21a.html)
Supplement: Supplementary file [file nabati21a-supp.pdf]

# Online Limited Memory Neural-Linear Bandits with Likelihood Matching - Supplementary Material

Ofir Nabati<sup>1</sup> Tom Zahavy<sup>1,2</sup> Shie Mannor<sup>1,3</sup>

## A. Representation drift experiment

The NTK was sampled during training with the Shuttle Statlog dataset (Newman et al., 2008). We compute the NTK for two fixed contexts  $b$  and  $b'$ , taken from the dataset. Each context is composed of 9 features describing the space shuttle flight. The goal is to predict the state of the radiator of the shuttle (the reward). There are  $N = 7$  possible actions; for correct predictions the reward is  $r = 1$  and  $r = 0$  otherwise.

The weights of the network were initialized according to (Jacot et al., 2018). We ran the experiments for various network widths: 50, 100, 500, and 1024. The network was trained as described in the main paper (Method and setup) with a random policy. The NTK was sampled every 50 iterations during training for the estimated reward of the first action. The graphs below present  $K(b, b)$ ,  $K(b', b')$  and  $K(b, b')$  from left to right accordingly during training averaged over 10 seeds.

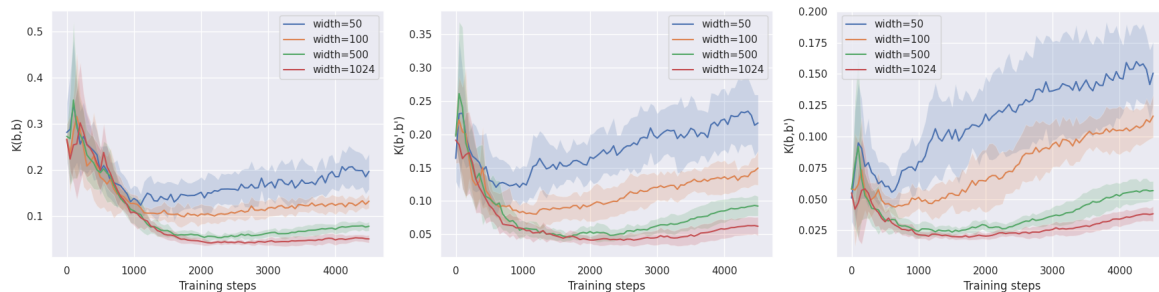

## B. Raw results

| Name          | d   | A | Full memory         |                  | Limited memory    |                 |                    | NTK based   |                  |                  |
|---------------|-----|---|---------------------|------------------|-------------------|-----------------|--------------------|-------------|------------------|------------------|
|               |     |   | LinearTS            | NeuralLinear     | LiM2 (Ours)       | NeuralLinear-MM | NeuralLinear-Naive | NeuralUCB   | NeuralTS         | NeuralLinear-NTK |
| Mushroom      | 117 | 2 | <b>11162 ± 1167</b> | 10810 ± 428      | 9880 ± 1776       | 4602 ± 1408     | 4843 ± 1228        | -32 ± 3     | -34 ± 18         | 9785 ± 1012      |
| Financial     | 21  | 8 | 3752 ± 8            | 3560 ± 12        | <b>3762 ± 18</b>  | 2802 ± 21       | 2726 ± 23          | 1116 ± 824  | 876 ± 595        | 3610 ± 18        |
| Jester        | 32  | 8 | <b>15944 ± 170</b>  | 14731 ± 304      | 14926 ± 571       | 11940 ± 1307    | 11647 ± 1066       | 13397 ± 7   | 13397 ± 8        | 14642 ± 200      |
| Adult         | 88  | 2 | 4008 ± 14           | 4003 ± 12        | <b>4043 ± 15</b>  | 3483 ± 33       | 3477 ± 16.5        | 3768 ± 2    | 3769 ± 2         | 3990 ± 17        |
| Coverttype    | 54  | 7 | <b>2961 ± 25</b>    | 2742 ± 40        | 2719 ± 62         | 2241 ± 30       | 2272 ± 37          | 1870 ± 11   | 1877 ± 83        | 2708 ± 31        |
| Census        | 377 | 9 | 1801 ± 15           | 2510 ± 21        | <b>2827 ± 22</b>  | 2099 ± 39       | 2114 ± 34          | 2019 ± 94   | 1926 ± 76        | 2517 ± 42        |
| Statlog       | 9   | 7 | 4460 ± 19           | 4729 ± 6         | <b>4820 ± 68</b>  | 4545 ± 34       | 4476 ± 19          | 4075 ± 3    | 4348 ± 265       | 4722 ± 12        |
| Epileptic     | 178 | 5 | 1204 ± 29           | <b>1734 ± 46</b> | 1501 ± 115        | 1411 ± 30       | 1368 ± 26          | 1010 ± 2    | 1011 ± 2         | 1431 ± 47        |
| Smartphones   | 561 | 6 | 3092 ± 18           | 4208 ± 23        | <b>4313 ± 46</b>  | 2647 ± 17       | 2626 ± 16          | 2214 ± 1548 | 3166 ± 1113      | 4191 ± 32        |
| Scania Trucks | 170 | 2 | 4710 ± 171          | 4837 ± 132       | 4856 ± 111        | 4574 ± 220      | 4650 ± 103         | 4919 ± 19   | <b>4922 ± 23</b> | 4730 ± 179       |
| Amazon        | 7K  | 5 | -                   | 3024 ± 25        | <b>3052 ± 160</b> | 2793 ± 41       | 2804 ± 41          | -           | -                | 3014 ± 37        |

Table 1. Cumulative reward on 11 real world datasets.

<sup>1</sup>Department of Electrical-Engineering, Technion Institute of Technology, Israel <sup>2</sup>DeepMind <sup>3</sup>Nvidia Research. Correspondence to: Ofir Nabati <ofirnabati@gmail.com>.

## References

- Jacot, A., Gabriel, F., and Hongler, C. Neural tangent kernel: Convergence and generalization in neural networks. In *Advances in neural information processing systems*, pp. 8571–8580, 2018.
- Newman, D., Smyth, P., Welling, M., and Asuncion, A. U. Distributed inference for latent dirichlet allocation. In *Advances in neural information processing systems*, pp. 1081–1088, 2008.
